# Supplementary material for: Proteome analysis of human amniotic mesenchymal stem cells (hA-MSCs) reveals impaired antioxidant ability, cytoskeleton and metabolic functionality in maternal obesity
Source: PubMed Central journal article supplement (PMC4850482; doi:10.1038/srep25270), 2016-04-29
Supplement: srep25270-s1.pdf [file srep25270-s1.pdf]

## **Supplementary Information for**

### **Proteome analysis of human amniotic mesenchymal stem cells (hA-MSCs) reveals impaired antioxidant ability, cytoskeleton and metabolic functionality in maternal obesity**

Valentina Capobianco<sup>1\*</sup>, Marianna Caterino<sup>1,2\*</sup>, Laura Iaffaldano<sup>1</sup>, Carmela Nardelli<sup>1,2</sup>, Angelo Sirico<sup>3</sup>, Luigi Del Vecchio<sup>1,2</sup>, Pasquale Martinelli<sup>3</sup>, Lucio Pastore<sup>1,2</sup>, Pietro Pucci<sup>1,4</sup>, Lucia Sacchetti<sup>1†</sup>

<sup>1</sup>CEINGE-Biotecnologie Avanzate S.C.a R.L., Via Gaetano Salvatore 486, 80145 Naples, Italy

<sup>2</sup>Dipartimento di Medicina Molecolare e Biotecnologie Mediche, Università degli Studi di Napoli Federico II, Via S. Pansini 5, 80131 Naples, Italy

<sup>3</sup>Dipartimento di Neuroscienze e Scienze Riproduttive ed Odontostomatologiche, Via S. Pansini 5, 80131 Naples, Italy.

<sup>4</sup>Dipartimento di Scienze chimiche, Via Cintia, Complesso Monte Sant'Angelo 21, 80126 Naples, Italy

\*These authors contributed equally to the paper

†**Corresponding author:**

Lucia Sacchetti, e-mail: [sacchett@unina.it](mailto:sacchett@unina.it)

This file include:

1. Supplementary Table S1
2. Supplementary Table S2
3. Supplementary Figure S1
4. Supplementary Figure S2

(a)

| <b>Pregnant women features</b>                      | <b>Obese</b> | <b>Non-obese</b> |
|-----------------------------------------------------|--------------|------------------|
| Subjects (n)                                        | 12           | 6                |
| Age (years)                                         | 34.0 ± 3.5   | 34.3 ± 6.8       |
| Weight (kg) <sup>a</sup>                            | 111.3 ± 19.9 | 59.8 ± 5.1       |
| Height (m)                                          | 1.60 ± 0.1   | 1.67 ± 2.2       |
| BMI pre-pregnancy (kg/m <sup>2</sup> ) <sup>a</sup> | 42.7 ± 7.7   | 21.3 ± 3.3       |
| Weight gain in pregnancy                            | 9.5 ± 5.2    | 14.0 ± 4.2       |
| Systolic blood pressure (mmHg)                      | 122.7 ± 12.9 | 120.0 ± 0.5      |
| Diastolic blood pressure (mmHg)                     | 79.0 ± 9.7   | 76.7 ± 5.7       |
| Cardiac frequency                                   | 80.5 ± 4.4   | 82.5 ± 3.5       |
| Gestational age                                     | 39.0 ± 1.2   | 38.3 ± 0.5       |
| Glucose (mmol/L)                                    | 4.3 ± 0.6    | 3.8 ± 0.4        |
| Cholesterol (mmol/L)                                | 7.1 ± 2.1    | 7.4 ± 0.5        |
| Triglycerides (mmol/L)                              | 2.8 ± 1.1    | 2.2 ± 1.3        |
| AST (U/L)                                           | 15.1 ± 4.7   | 19.7 ± 8.1       |
| ALT (U/L)                                           | 13.3 ± 4.4   | 14.7 ± 13.8      |
| ALP (U/L)                                           | 131.7 ± 46.0 | 126.2 ± 39.0     |
| GGT (U/L)                                           | 10.7 ± 5.8   | 9.5 ± 5.7        |
| PCR (mg/L)                                          | 6.4 ± 6.1    | 6.4 ± 2.6        |
| Albumin (g/dl )                                     | 3.2 ± 0.4    | 3.4 ± 0.3        |
| Total proteins (g/dl )                              | 6.1 ± 0.6    | 6.1 ± 0.4        |
| Leptin (L) (ng/ml) <sup>b</sup>                     | 35.0 ± 8.5   | 12.3 ± 7.9       |
| Adiponectin (A) (µg/ml)                             | 7.2 ± 4.3    | 10.8 ± 2.8       |
| L/A <sup>c</sup>                                    | 7.4 ± 3.6    | 1.2 ± 0.7        |

(b)

| <b>Newborn features</b> | <b>Obese newborns</b> | <b>Non-obese newborns</b> |
|-------------------------|-----------------------|---------------------------|
| Birth weight (g)        | 3416.3 ± 502.7        | 3212.5 ± 502.2            |
| Length (cm)             | 50.3 ± 1.3            | 50.7 ± 2.2                |
| Head circumference (cm) | 34.8 ± 1.4            | 35.0 ± 0.5                |
| Apgar 1'                | 7.6 ± 1.0             | 8.0 ± 0.8                 |
| Apgar 5'                | 8.8 ± 0.5             | 8.7 ± 0.5                 |

**Supplementary Table S1.** Clinical and biochemical characteristics of obese and non-obese pregnant women (a) and of their newborns (b) Data are expressed as mean ± Standard Deviation. Statistically significant difference at the Student's *t* test. <sup>a</sup>P < 0.0001; <sup>b</sup>P = 0.002; <sup>c</sup>P = 0.01

**(a) Pathways predicted by DAVID**

| <b>Annotation Cluster 1</b> | <b>Enrichment Score: 4.62</b> | <b>Proteins</b>                                                | <b>P_Value</b> |
|-----------------------------|-------------------------------|----------------------------------------------------------------|----------------|
| GOTERM_BP_FAT               | response to unfolded protein  | HSPH1, VCP, HSPB1, CLIC1, HSPD1, SERPINH1, HSPA8               | 3.2E-7         |
| SP_PIR_KEYWORDS             | stress response               | HSPH1, HSPB1, HSPD1, SERPINH1, HSPA8, HSPA9                    | 1.8E-6         |
| GOTERM_BP_FAT               | response to protein stimulus  | HSPH1, VCP, HSPB1, CLIC1, HSPD1, SERPINH1, HSPA8               | 3.6E-6         |
| SP_PIR_KEYWORDS             | heat shock                    | HSPB1, HSPD1, SERPINH1                                         | 5.5E-5         |
| SP_PIR_KEYWORDS             | stress-induced protein        | HSPB1, HSPD1, SERPINH1                                         | 2.6E-4         |
| GOTERM_BP_FAT               | response to organic substance | HSPH1, VCP, ALDOC, HSPB1, CLIC1, HSPD1, ANXA5, SERPINH1, HSPA8 | 6.6E-3         |

| <b>Annotation Cluster 2</b> | <b>Enrichment Score: 4.46</b>        | <b>Proteins</b>                                                                 | <b>P_Value</b> |
|-----------------------------|--------------------------------------|---------------------------------------------------------------------------------|----------------|
| GOTERM_CC_FAT               | pigment granule                      | ANXA6, HSP90B1, SND1, PDCD6IP, PDIA4, HSPA5, HSPA8, ANXA2                       | 5.6E-8         |
| GOTERM_CC_FAT               | melanosome                           | ANXA6, HSP90B1, SND1, PDCD6IP, PDIA4, HSPA5, HSPA8, ANXA2                       | 5.6E-8         |
| GOTERM_CC_FAT               | cytoplasmic membrane-bounded vesicle | ANXA6, SEC23A, HSP90B1, SND1, ACTN1, PDCD6IP, PDIA4, HSPA5, HSPD1, HSPA8, ANXA2 | 5.2E-5         |
| GOTERM_CC_FAT               | membrane-bounded vesicle             | ANXA6, SEC23A, HSP90B1, SND1, ACTN1, PDCD6IP, PDIA4, HSPA5, HSPD1, HSPA8, ANXA2 | 6.8E-5         |
| GOTERM_CC_FAT               | cytoplasmic vesicle                  | ANXA6, SEC23A, HSP90B1, SND1, ACTN1, PDCD6IP, PDIA4, HSPA5, HSPD1, HSPA8, ANXA2 | 1.9E-4         |
| GOTERM_CC_FAT               | vesicle                              | ANXA6, SEC23A, HSP90B1, SND1, ACTN1, PDCD6IP, PDIA4, HSPA5, HSPD1, HSPA8, ANXA2 | 2.7E-4         |

| <b>Annotation Cluster 3</b> | <b>Enrichment Score: 4.33</b>         | <b>Proteins</b>                                      | <b>P_Value</b> |
|-----------------------------|---------------------------------------|------------------------------------------------------|----------------|
| SP_PIR_KEYWORDS             | molecular chaperone                   | LONP1, CCT6A, HSPD1, SERPINH1, HSPA8                 | 5.6E-8         |
| SP_PIR_KEYWORDS             | stress response                       | HSPH1, HSPB1, HSPD1, SERPINH1, HSPA8, HSPA9          | 1.8E-6         |
| INTERPRO                    | Heat shock protein Hsp70              | HSPH1, HSPA5, HSPA8, HSPA9                           | 9.1E-6         |
| INTERPRO                    | Heat shock protein 70                 | HSPH1, HSPA5, HSPA8, HSPA9                           | 9.1E-6         |
| GOTERM_MF_FAT               | unfolded protein binding              | HSP90B1, CCT6A, HSPA5, HSPD1, SERPINH1, HSPA8, HSPA9 | 1.1E-5         |
| INTERPRO                    | Heat shock protein 70, conserved site | HSPH1, HSPA5, HSPA8, HSPA9                           | 1.9E-5         |
| SP_PIR_KEYWORDS             | Chaperone                             | HSP90B1, CCT6A, HSPD1, SERPINH1, HSPA8, HSPA9        | 1.2E-4         |
| PIR_SUPERFAMILY             | PIRSF002581:chaperone HSP70           | HSPA5, HSPA8, HSPA9                                  | 9.9E-4         |
| GOTERM_BP_FAT               | protein folding                       | HSP90B1, CCT6A, HSPD1, HSPA8, HSPA9                  | 5.0E-3         |
| GOTERM_CC_FAT               | cell surface                          | HSPB1, HSPA5, HSPD1, HSPA8, HSPA9                    | 5.0E-2         |

| <b>Annotation Cluster 4</b> | <b>Enrichment Score: 3.76</b> | <b>Proteins</b>                      | <b>P_Value</b> |
|-----------------------------|-------------------------------|--------------------------------------|----------------|
| SP_PIR_KEYWORDS             | molecular chaperone           | LONP1, CCT6A, HSPD1, SERPINH1, HSPA8 | 5.6E-8         |
| SP_PIR_KEYWORDS             | ATP                           | LONP1, PFKP, HK1, HSPD1, HSPA8       | 5.9E-3         |

|               |                 |                                        |        |
|---------------|-----------------|----------------------------------------|--------|
| GOTERM_MF_FAT | ATPase activity | LONP1, VCP, RUVBL1, HSPD1, MYH9, HSPA8 | 1.5E-2 |
|---------------|-----------------|----------------------------------------|--------|

| Annotation Cluster 5 | Enrichment Score: 3.68        | Proteins                                                                                                                             | P_Value |
|----------------------|-------------------------------|--------------------------------------------------------------------------------------------------------------------------------------|---------|
| SP_PIR_KEYWORDS      | atp-binding                   | PFKP, HK1, ACLY, CCT6A, MYH9, ACTG1, HSPH1, LONP1, HSP90B1, VCP, UBA1, LARS, HSPA5, HSPD1, RUVBL1, AARS2, HSPA8, HSPA9               | 2.8E-7  |
| SP_PIR_KEYWORDS      | nucleotide-binding            | PFKP, HK1, ACLY, CCT6A, MYH9, ACTG1, HSPH1, LONP1, HSP90B1, VCP, UBA1, LARS, HSPA5, HSPD1, RUVBL1, AARS2, HSPA8, HSPA9               | 7.7E-6  |
| GOTERM_MF_FAT        | ATP binding                   | PFKP, HK1, ACLY, CCT6A, MYH9, ACTG1, HSPH1, LONP1, HSP90B1, VCP, UBA1, LARS, HSPA5, HSPD1, RUVBL1, AARS2, HSPA8, HSPA9               | 1.3E-4  |
| GOTERM_MF_FAT        | adenyl ribonucleotide binding | PFKP, HK1, ACLY, CCT6A, MYH9, ACTG1, HSPH1, LONP1, HSP90B1, VCP, UBA1, LARS, HSPA5, HSPD1, RUVBL1, AARS2, HSPA8, HSPA9               | 1.6E-4  |
| GOTERM_MF_FAT        | adenyl nucleotide binding     | PFKP, HK1, ACLY, CCT6A, MYH9, ACTG1, HSPH1, LONP1, HSP90B1, VCP, UBA1, LARS, HSPA5, HSPD1, RUVBL1, AARS2, HSPA8, HSPA9               | 2.9E-4  |
| GOTERM_MF_FAT        | purine nucleoside binding     | PFKP, HK1, ACLY, CCT6A, MYH9, ACTG1, HSPH1, LONP1, HSP90B1, VCP, UBA1, LARS, HSPA5, HSPD1, RUVBL1, AARS2, HSPA8, HSPA9               | 3.5E-4  |
| GOTERM_MF_FAT        | nucleoside binding            | PFKP, HK1, ACLY, CCT6A, MYH9, ACTG1, HSPH1, LONP1, HSP90B1, VCP, UBA1, LARS, HSPA5, HSPD1, RUVBL1, AARS2, HSPA8, HSPA9               | 3.8E-4  |
| GOTERM_MF_FAT        | purine ribonucleotide binding | PFKP, HK1, ACLY, CCT6A, MYH9, ACTG1, HSPH1, LONP1, HSP90B1, VCP, UBA1, LARS, HSPA5, HSPD1, RUVBL1, AARS2, HSPA8, HSPA9               | 1.7E-3  |
| GOTERM_MF_FAT        | ribonucleotide binding        | PFKP, HK1, ACLY, CCT6A, MYH9, ACTG1, HSPH1, LONP1, HSP90B1, VCP, UBA1, LARS, HSPA5, HSPD1, RUVBL1, AARS2, HSPA8, HSPA9               | 1.7E-3  |
| GOTERM_MF_FAT        | nucleotide binding            | PGD, PFKP, HK1, ACLY, CCT6A, MYH9, HNRNPA1, ACTG1, HSPH1, LONP1, HSP90B1, VCP, UBA1, LARS, HSPA5, HSPD1, RUVBL1, AARS2, HSPA8, HSPA9 | 2.4E-3  |
| GOTERM_MF_FAT        | purine nucleotide binding     | PFKP, HK1, ACLY, CCT6A, MYH9, ACTG1, HSPH1, LONP1, HSP90B1, VCP, UBA1, LARS, HSPA5, HSPD1, RUVBL1, AARS2, HSPA8, HSPA9               | 2.8E-3  |

| Annotation Cluster 6 | Enrichment Score: 3.66                       | Proteins                                                                                                                                                                | P_Value |
|----------------------|----------------------------------------------|-------------------------------------------------------------------------------------------------------------------------------------------------------------------------|---------|
| SP_PIR_KEYWORDS      | cytoskeleton                                 | ACTG1, LIMA1, LASP1, CALD1, HSPB1, ACTN1, RANGAP1, RUVBL1, PD CD6IP, FLNB, FLNA                                                                                         | 2.1E-5  |
| GOTERM_CC_FAT        | intracellular non-membrane-bounded organelle | RPSA, LIMA1, RRB P1, CALD1, ALDOC, VIM, UCHL1, LMNA, ANXA1, ACTN1, RANGAP1, DPYSL3, MYH9, FLNB, HNRNPA1, FLNA, ACTG1, LONP1, VCP, LASP1, HSPB1, PD CD6IP, RUVBL1, HSPA9 | 5.5E-5  |
| GOTERM_CC_FAT        | non-membrane-bounded organelle               | RPSA, LIMA1, RRB P1, CALD1, ALDOC, VIM, UCHL1, LMNA, ANXA1, ACTN1, RANGAP1, DPYSL3, MYH9, FLNB, HNRNPA1, FLNA, ACTG1, LONP1, VCP, LASP1, HSPB1, PD CD6IP, RUVBL1, HSPA9 | 5.5E-5  |
| GOTERM_CC_FAT        | cytoskeleton                                 | LIMA1, ALDOC, CALD1, VIM, LMNA, ANXA1, ACTN1, DPYSL3, MYH9, FLNB, FLNA, ACTG1, LASP1, HSPB1, PD CD6IP, RUVBL1                                                           | 2.2E-4  |

|               |                   |                                                              |        |
|---------------|-------------------|--------------------------------------------------------------|--------|
| GOTERM_CC_FAT | cytoskeletal part | LIMA1, LASP1, CALD1, VIM, LMNA, HSPB1, RUVBL1, PDCD6IP, MYH9 | 3.4E-2 |
|---------------|-------------------|--------------------------------------------------------------|--------|

| Annotation Cluster 7 | Enrichment Score: 3.64                            | Proteins                                                  | P_Value |
|----------------------|---------------------------------------------------|-----------------------------------------------------------|---------|
| SP_PIR_KEYWORDS      | acetylated amino end                              | ANXA6, ACTG1, APEH, PGD, ANXA1, ANXA5, HNRNPA1, ANXA2     | 2.3E-8  |
| SP_PIR_KEYWORDS      | duplication                                       | ANXA6, ANXA1, PFKP, HK1, ACTN1, PDIA4, ANXA5, FLNA, ANXA2 | 4.5E-7  |
| SMART                | SM00335:ANX                                       | ANXA6, ANXA1, ANXA5, ANXA2                                | 4.4E-6  |
| SP_PIR_KEYWORDS      | endonexin fold                                    | ANXA6, ANXA1, ANXA5, ANXA2                                | 4.4E-6  |
| SP_PIR_KEYWORDS      | annexin                                           | ANXA6, ANXA1, ANXA5, ANXA2                                | 9.7E-6  |
| UP_SEQ_FEATURE       | repeat:Annexin 1                                  | ANXA6, ANXA1, ANXA5, ANXA2                                | 9.9E-6  |
| UP_SEQ_FEATURE       | repeat:Annexin 2                                  | ANXA6, ANXA1, ANXA5, ANXA2                                | 9.9E-6  |
| UP_SEQ_FEATURE       | repeat:Annexin 3                                  | ANXA6, ANXA1, ANXA5, ANXA2                                | 9.9E-6  |
| UP_SEQ_FEATURE       | repeat:Annexin 4                                  | ANXA6, ANXA1, ANXA5, ANXA2                                | 9.9E-6  |
| SP_PIR_KEYWORDS      | calcium/phospholipid-binding                      | ANXA6, ANXA1, ANXA5, ANXA2                                | 1.2E-5  |
| INTERPRO             | IPR001464:Annexin                                 | ANXA6, ANXA1, ANXA5, ANXA2                                | 1.5E-5  |
| INTERPRO             | IPR018252:Annexin repeat, conserved site          | ANXA6, ANXA1, ANXA5, ANXA2                                | 1.5E-5  |
| INTERPRO             | IPR018502:Annexin repeat                          | ANXA6, ANXA1, ANXA5, ANXA2                                | 1.5E-5  |
| SP_PIR_KEYWORDS      | calcium binding                                   | ANXA6, HSP90B1, ANXA1, ACTN1, ANXA5, ANXA2                | 1.6E-5  |
| SP_PIR_KEYWORDS      | phospholipid binding                              | ANXA6, ANXA1, ANXA5, ANXA2                                | 4.0E-5  |
| PIR_SUPERFAMILY      | PIRSF002359:annexin I                             | ANXA6, ANXA1, ANXA5, ANXA2                                | 4.5E-5  |
| GOTERM_MF_FAT        | GO:0005544~calcium-dependent phospholipid binding | ANXA6, ANXA1, ANXA5, ANXA2                                | 1.9E-4  |
| GOTERM_MF_FAT        | GO:0004859~phospholipase inhibitor activity       | ANXA1, ANXA5, ANXA2                                       | 1.2E-3  |
| GOTERM_MF_FAT        | GO:0055102~lipase inhibitor activity              | ANXA1, ANXA5, ANXA2                                       | 1.9E-3  |
| GOTERM_MF_FAT        | GO:0004857~enzyme inhibitor activity              | SERPINB6, ANXA1, HSPA5, ANXA5, SERPINH1, ANXA2            | 6.5E-3  |
| GOTERM_MF_FAT        | GO:0005543~phospholipid binding                   | ANXA6, ANXA1, ANXA5, ANXA2                                | 4.3E-2  |

**(b) Pathways predicted by KEGG**

| Protein processing in endoplasmic reticulum P=7.27e-11; adjP=2.33e-09 |                                                               |
|-----------------------------------------------------------------------|---------------------------------------------------------------|
| Gene Symbol                                                           | Gene Name                                                     |
| SEC23A                                                                | Sec23 homolog A (S. cerevisiae)                               |
| HSPH1                                                                 | heat shock 105kDa/110kDa protein 1                            |
| HSP90B1                                                               | heat shock protein 90kDa beta (Grp94), member 1               |
| HSPA5                                                                 | heat shock 70kDa protein 5 (glucose-regulated protein, 78kDa) |
| HSPA8                                                                 | heat shock 70kDa protein 8                                    |
| RRBP1                                                                 | ribosome binding protein 1 homolog 180kDa (dog)               |
| VCP                                                                   | valosin containing protein                                    |

|       |                                                |
|-------|------------------------------------------------|
| PDIA4 | protein disulfide isomerase family A, member 4 |
|-------|------------------------------------------------|

| <b>Glycolysis / Gluconeogenesis P=3.91e-10; adjP=6.26e-09</b> |                                            |
|---------------------------------------------------------------|--------------------------------------------|
| <b>Gene Symbol</b>                                            | <b>Gene Name</b>                           |
| ALDH7A1                                                       | aldehyde dehydrogenase 7 family, member A1 |
| HK1                                                           | hexokinase 1                               |
| PKM                                                           | pyruvate kinase, muscle                    |
| ENO1                                                          | enolase 1, (alpha)                         |
| ALDOC                                                         | aldolase C, fructose-bisphosphate          |
| PFKP                                                          | phosphofructokinase, platelet              |

| <b>Metabolic pathways P=2.87e-06; adjP=3.06e-05</b> |                                            |
|-----------------------------------------------------|--------------------------------------------|
| <b>Gene Symbol</b>                                  | <b>Gene Name</b>                           |
| ALDOC                                               | aldolase C, fructose-bisphosphate          |
| ACLY                                                | ATP citrate lyase                          |
| ALDH7A1                                             | aldehyde dehydrogenase 7 family, member A1 |
| HK1                                                 | hexokinase 1                               |
| PKM                                                 | pyruvate kinase, muscle                    |
| ENO1                                                | enolase 1, (alpha)                         |
| DLST                                                | dihydrolipoamide S-succinyltransferase     |
| PFKP                                                | phosphofructokinase, platelet              |
| MTAP                                                | methylthioadenosine phosphorylase          |
| PGD                                                 | phosphogluconate dehydrogenase             |

| <b>Focal adhesion P=8.33e-06; adjP=5.33e-05</b> |                                               |
|-------------------------------------------------|-----------------------------------------------|
| <b>Gene Symbol</b>                              | <b>Gene Name</b>                              |
| ACTN1                                           | actinin, alpha 1                              |
| FLNA                                            | filamin A, alpha                              |
| PPP1R12A                                        | protein phosphatase 1, regulatory subunit 12A |
| ACTG1                                           | actin, gamma 1                                |
| FLNB                                            | filamin B, beta                               |

| <b>Pentose phosphate pathway P=6.95e-06; adjP=5.33e-05</b> |                                   |
|------------------------------------------------------------|-----------------------------------|
| <b>Gene Symbol</b>                                         | <b>Gene Name</b>                  |
| ALDOC                                                      | aldolase C, fructose-bisphosphate |

|      |                                |
|------|--------------------------------|
| PFKP | phosphofructokinase, platelet  |
| PGD  | phosphogluconate dehydrogenase |

**Fructose and mannose P=1.68e-05; adjP=8.96e-05**

| <b>Gene Symbol</b> | <b>Gene Name</b>                  |
|--------------------|-----------------------------------|
| HK1                | hexokinase 1                      |
| ALDOC              | aldolase C, fructose-bisphosphate |
| PFKP               | phosphofructokinase, platelet     |

**Arrhythmogenic right ventricular cardiomyopathy (ARVC) P=0.0001; adjP=0.0004**

| <b>Gene Symbol</b> | <b>Gene Name</b> |
|--------------------|------------------|
| ACTN1              | actinin, alpha 1 |
| ACTG1              | actin, gamma 1   |
| LMNA               | lamin A/C        |

**RNA degradation P=0.0001; adjP=0.0004**

| <b>Gene Symbol</b> | <b>Gene Name</b>                        |
|--------------------|-----------------------------------------|
| HSPA9              | heat shock 70kDa protein 9 (mortalin)   |
| HSPD1              | heat shock 60kDa protein 1 (chaperonin) |
| ENO1               | enolase 1, (alpha)                      |

**Regulation of actin cytoskeleton P=0.0002; adjP=0.0007**

| <b>Gene Symbol</b> | <b>Gene Name</b>                              |
|--------------------|-----------------------------------------------|
| MYH9               | myosin, heavy chain 9, non-muscle             |
| ACTN1              | actinin, alpha 1                              |
| PPP1R12A           | protein phosphatase 1, regulatory subunit 12A |
| ANXA2              | annexin 2                                     |
| ACTG1              | actin, gamma 1                                |

**Supplementary Table S2.** List of the significantly impaired pathways in Ob-hA-MSCs respect to Co-hA-MSCs, and proteins included in each of them as predicted by DAVID (a) and KEGG (b).

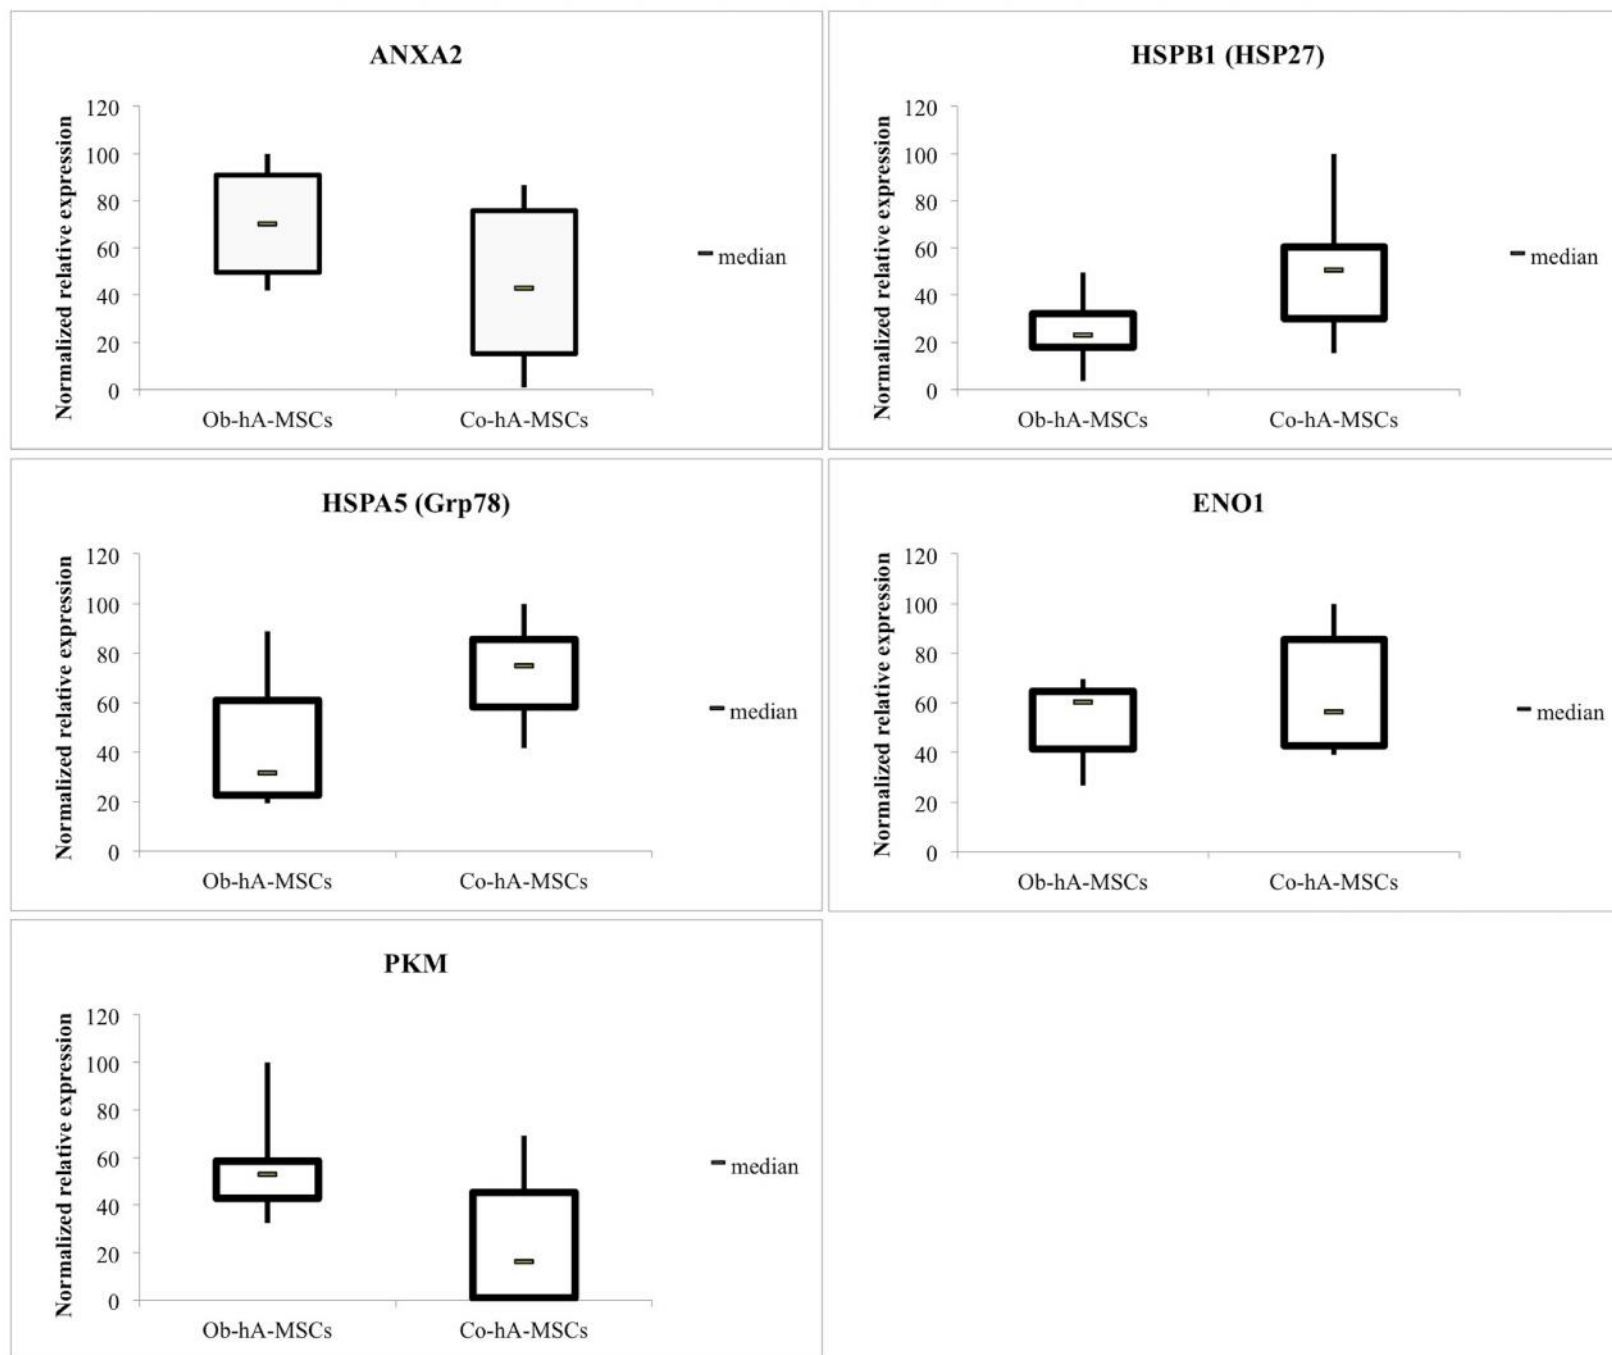

**Supplementary Figure S1. Western blot evaluation of differently expressed proteins in Ob-hA-MSCs vs Co-hA-MSCs.** The protein expression quantification for the selected proteins (ANXA2, HSPB1, HSPA5, ENO1 and PKM) normalized to GAPDH. The data are expressed as percent relative expression, i.e. for each protein, the sample with the highest expression of that protein was set 100%. The bottom and top of each box represent the 25th and 75th percentile, respectively; the thick band inside each box shows the 50th percentile (the median). The ends of the whiskers represent the minimum and maximum values of each group of data.



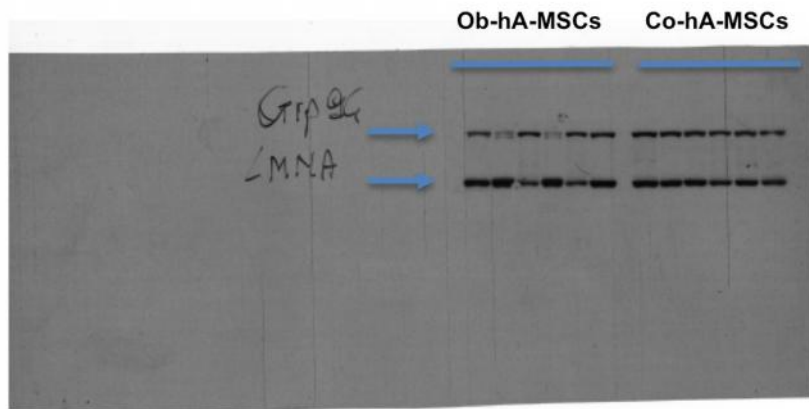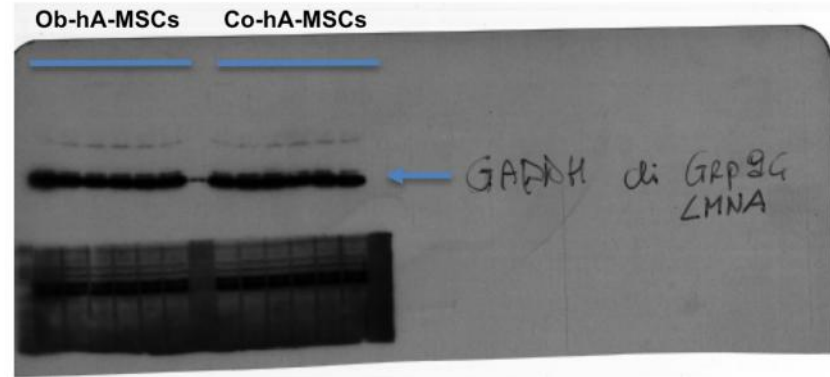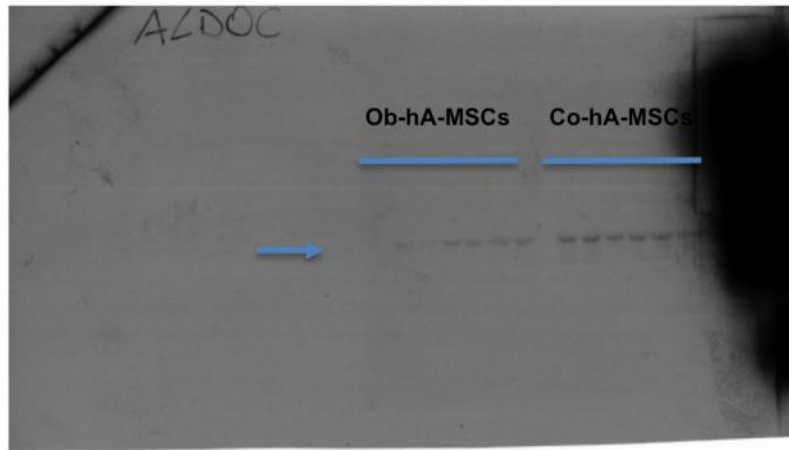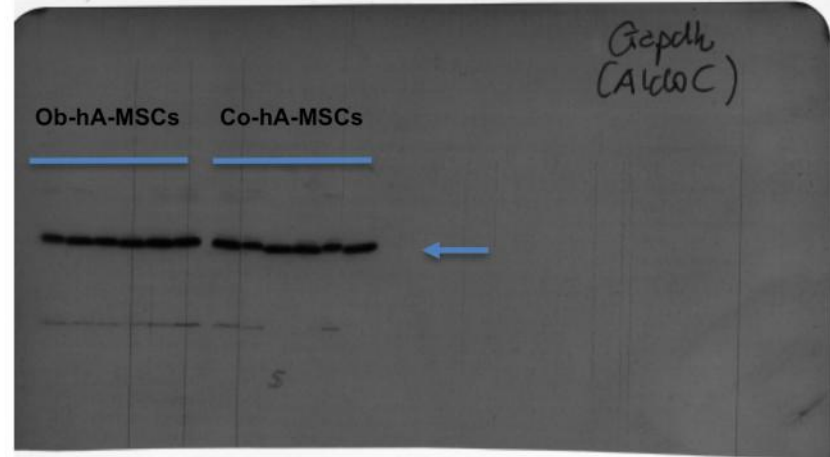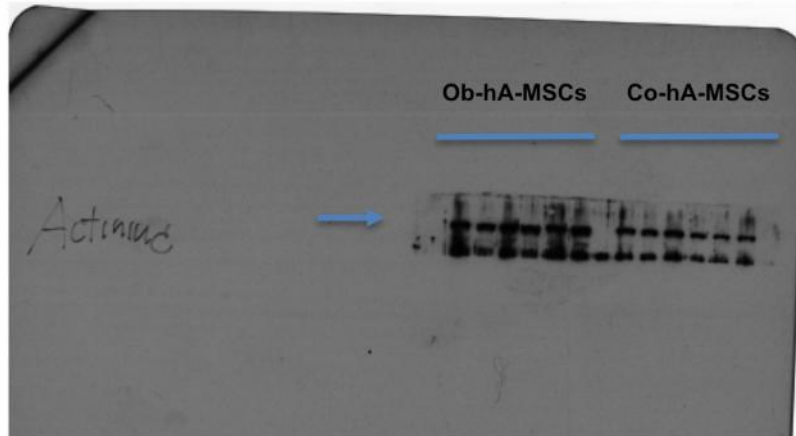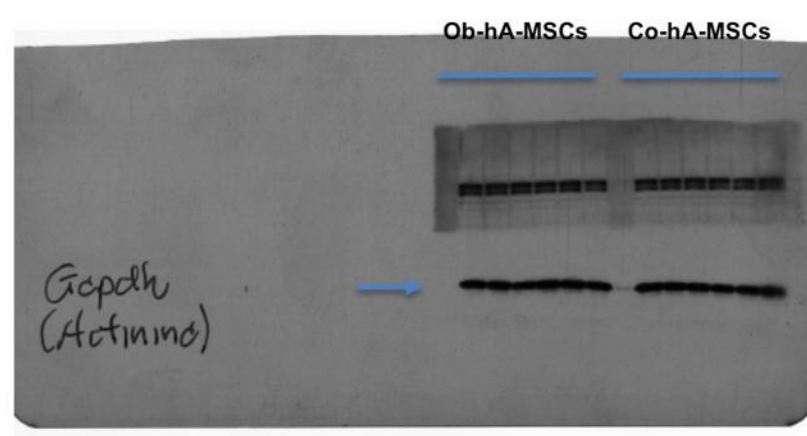

**Supplementary Figure S2.** Full-length blots of statistically significant proteins [HSP90B1 (Grp94), LMNA, ACTN1 and ALDOC] in Ob-hA-MSCs vs Co-hA-MSCs.
